# Supplementary material for: Stability, CO2 sensitivity, oil tolerance and displacement efficiency of polymer enhanced foam
Source: Royal Society of Chemistry journal article supplement (doi:10.1039/c6ra27063h), 2017-01-01
Supplement: c6ra27063h1.pdf [file c6ra27063h1.pdf]

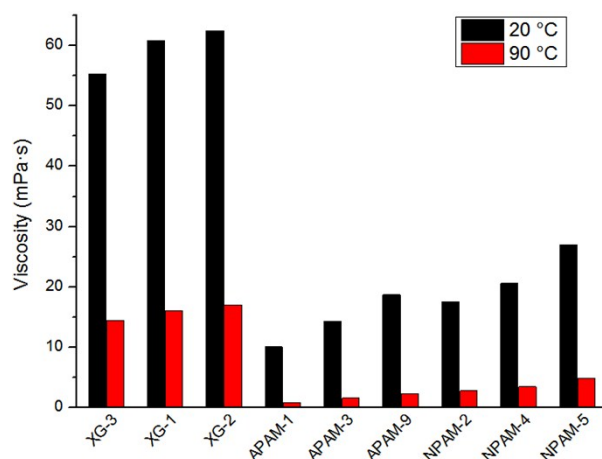

Fig. S1 Viscosity of different polymers, and concentration is 0.1 wt%.

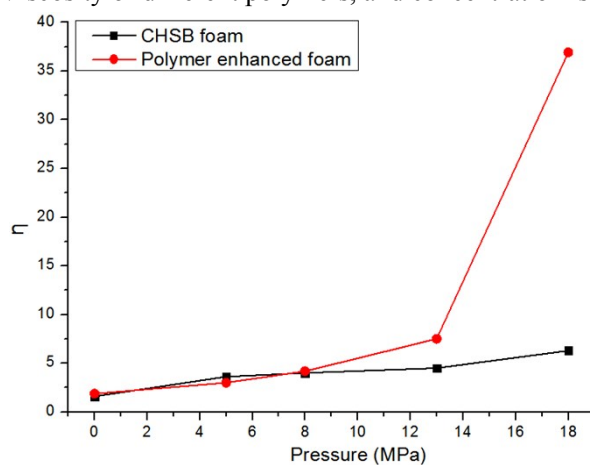

Fig. S2 The half-life ratio ( $\eta$ ) of CO<sub>2</sub> foam to N<sub>2</sub> foam as a function of pressure.

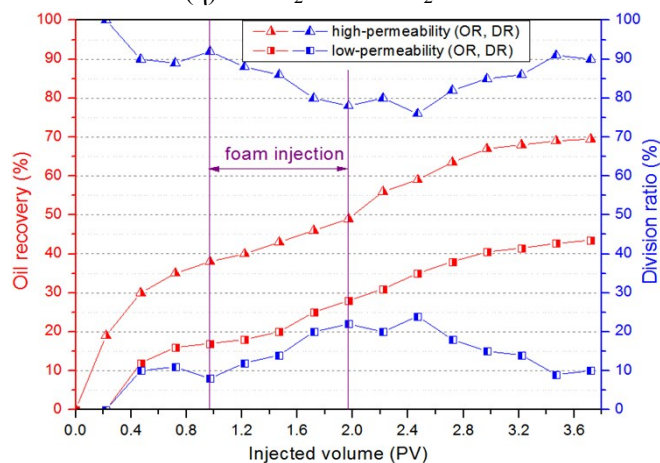

Fig. S3 Changes of oil recovery (OR) and division ratio (DR) in the high- and low-permeability of heterogeneous cores, and the permeability ratio is 3 and CHSB foam is injected.
